# Supplementary material
Source: PubMed Central journal article supplement (PMC8967765)
Supplement: NIHMS1760123-supplement-1760123_Sup_Info.pdf [file NIHMS1760123-supplement-1760123_Sup_Info.pdf]

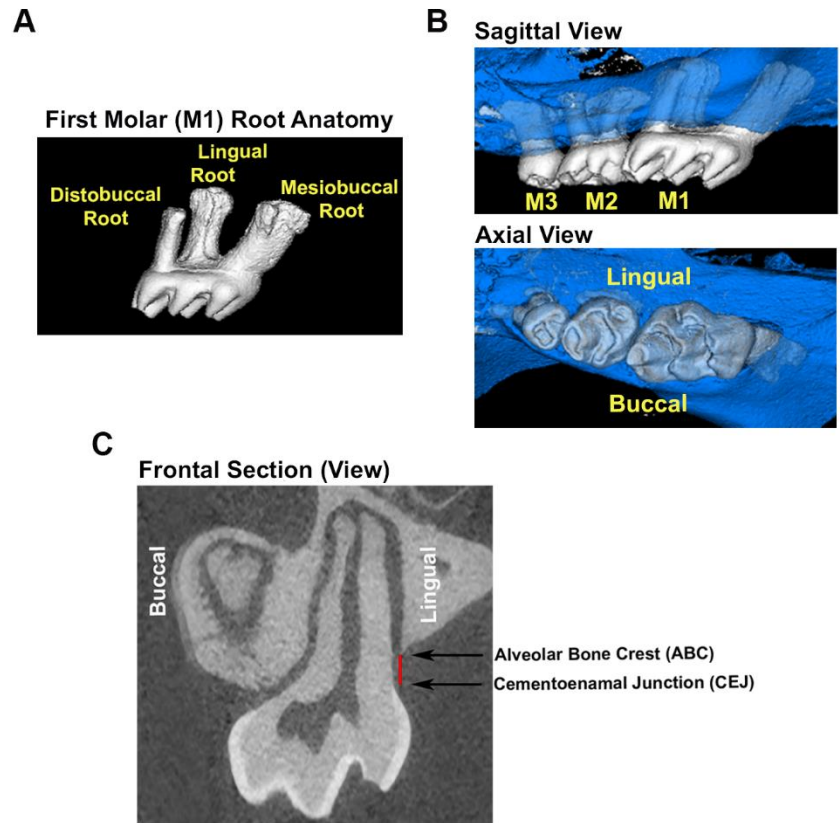

**Supplemental Figure 1. Micro-CT images of maxillary first molar dentoalveolar anatomy. A.** Maxillary first molar (M1) root anatomy. **B.** Sagittal view defining maxillary first, second and third molars (M1-M3). Axial view depicting buccal and lingual aspect of maxillary molars. **C.** Frontal view discerning the cemento enamel junction (CEJ) to alveolar bone crest (ABC) linear measurement at the mid-lingual aspect of the maxillary first molar.

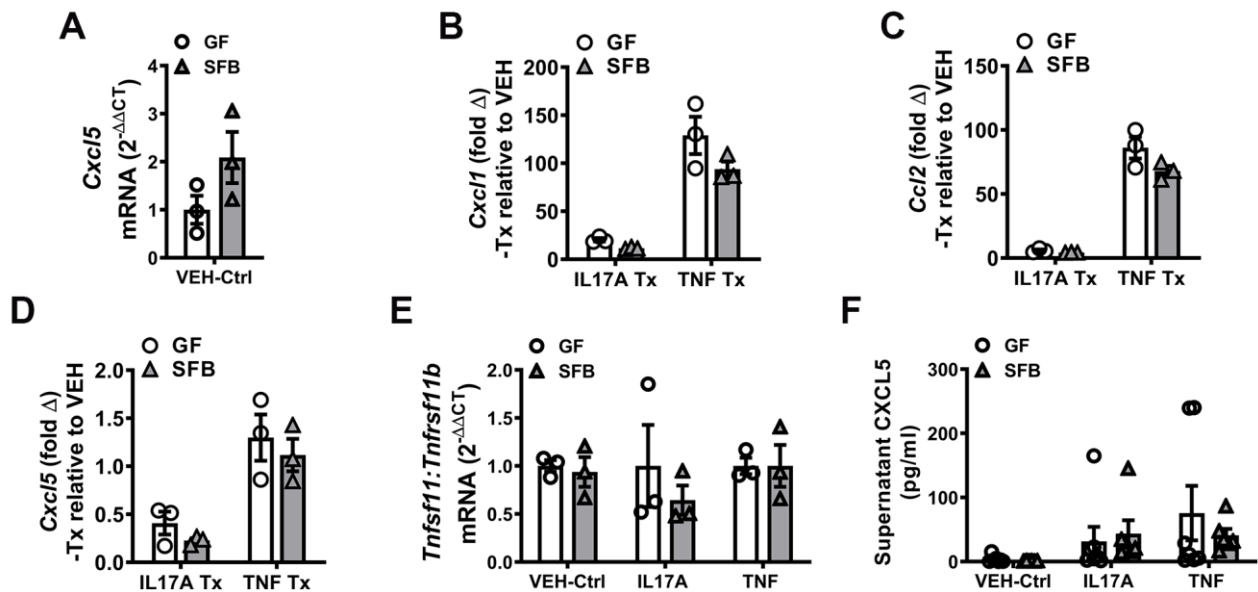

**Supplemental Figure 2. SFB actions on osteoblast-derived signaling mediators.** **A.** RNA was isolated from VEH-Ctrl-stimulated osteoblasts (OBs) for qRT-PCR analysis of *Cxcl5* mRNA (n=3/gp); relative quantification of mRNA was performed via the  $2^{-\Delta\Delta CT}$  method. **B-D.** qRT-PCR gene expression studies were carried out in IL17A- and TNF-stimulated OBs (n=3/gp). Relative quantification of **(B)** *Cxcl1*, **(C)** *Ccl2*, and **(D)** *Cxcl5* mRNA was performed by the  $2^{-\Delta\Delta CT}$  method; data expressed as treatment (IL17A or TNF) fold change relative to control (VEH-Ctrl). **E.** qRT-PCR analysis of *Tnfsf11(Rankl):Tnfrsf11b(Opg)* ratio mRNA in VEH-Ctrl-, IL17A-, and TNF-stimulated OBs (n=3/gp). Relative quantification of mRNA was performed via the  $2^{-\Delta\Delta CT}$  method. **F.** OB supernatant ELISA analysis of CXCL5 levels (n=6-7/gp). Unpaired t-test or 2-way ANOVA with Tukey post hoc test; data are reported as mean  $\pm$  SEM.

| <b>Supplemental Table 1. Supernatant CXCL1 ELISA Results</b> |                        |                                |                   |
|--------------------------------------------------------------|------------------------|--------------------------------|-------------------|
| <b>Tukey's multiple comparisons test</b>                     | <b>Mean Difference</b> | <b>95% Confidence Interval</b> | <b>P Value</b>    |
| <b>VEH-Ctrl:GF vs. VEH-Ctrl:SFB</b>                          | -7.241                 | -103.9 to 89.45                | <b>0.0435</b>     |
| <b>VEH-Ctrl:GF vs. IL17A :GF</b>                             | -66.87                 | -159.8 to 26.03                | 0.2756            |
| <b>VEH-Ctrl:GF vs. IL17A :SFB</b>                            | -78.34                 | -175.0 to 18.35                | 0.169             |
| <b>VEH-Ctrl:GF vs. TNF :GF</b>                               | -203.1                 | -296.0 to -110.2               | <b>&lt;0.0001</b> |
| <b>VEH-Ctrl:GF vs. TNF :SFB</b>                              | -303.6                 | -400.3 to -206.9               | <b>&lt;0.0001</b> |
| <b>VEH-Ctrl:SFB vs. IL17A :GF</b>                            | -59.63                 | -156.3 to 37.07                | 0.4408            |
| <b>VEH-Ctrl:SFB vs. IL17A :SFB</b>                           | -71.1                  | -171.4 to 29.24                | 0.2914            |
| <b>VEH-Ctrl:SFB vs. TNF :GF</b>                              | -195.8                 | -292.5 to -99.15               | <b>&lt;0.0001</b> |
| <b>VEH-Ctrl:SFB vs. TNF :SFB</b>                             | -296.4                 | -396.7 to -196.0               | <b>&lt;0.0001</b> |
| <b>IL17A :GF vs. IL17A :SFB</b>                              | -11.47                 | -108.2 to 85.22                | 0.9991            |
| <b>IL17A :GF vs. TNF :GF</b>                                 | -136.2                 | -229.1 to -43.32               | <b>0.0013</b>     |
| <b>IL17A :GF vs. TNF :SFB</b>                                | -236.7                 | -333.4 to -140.0               | <b>&lt;0.0001</b> |
| <b>IL17A :SFB vs. TNF :GF</b>                                | -124.7                 | -221.4 to -28.05               | <b>0.0055</b>     |
| <b>IL17A :SFB vs. TNF :SFB</b>                               | -225.3                 | -325.6 to -124.9               | <b>&lt;0.0001</b> |
| <b>TNF :GF vs. TNF :SFB</b>                                  | -100.5                 | -197.2 to -3.829               | <b>0.0378</b>     |

**Supplemental Table 1.** 2-Way ANOVA results for CXCL1 protein in supernatants derived from vehicle-control, IL17A, or TNF treated GF vs. SFB osteoblast cultures.

| <b>Supplemental Table 2. Supernatant CCL2 ELISA Results</b> |                        |                                |                   |
|-------------------------------------------------------------|------------------------|--------------------------------|-------------------|
| <b>Tukey's multiple comparisons test</b>                    | <b>Mean Difference</b> | <b>95% Confidence Interval</b> | <b>P Value</b>    |
| VEH-Ctrl:GF vs. VEH-Ctrl:SFB                                | -7.27                  | -87.68 to 73.14                | 0.9998            |
| VEH-Ctrl:GF vs. IL17A :GF                                   | -122.5                 | -199.8 to -45.28               | <b>0.0004</b>     |
| VEH-Ctrl:GF vs. IL17A :SFB                                  | -140.3                 | -220.7 to -59.90               | <b>0.0001</b>     |
| VEH-Ctrl:GF vs. TNF :GF                                     | -821.6                 | -898.8 to -744.3               | <b>&lt;0.0001</b> |
| VEH-Ctrl:GF vs. TNF :SFB                                    | -929.6                 | -1010 to -849.2                | <b>&lt;0.0001</b> |
| VEH-Ctrl:SFB vs. IL17A :GF                                  | -115.3                 | -195.7 to -34.85               | <b>0.0017</b>     |
| VEH-Ctrl:SFB vs. IL17A :SFB                                 | -133                   | -216.5 to -49.59               | <b>0.0004</b>     |
| VEH-Ctrl:SFB vs. TNF :GF                                    | -814.3                 | -894.7 to -733.9               | <b>&lt;0.0001</b> |
| VEH-Ctrl:SFB vs. TNF :SFB                                   | -922.3                 | -1006 to -838.9                | <b>&lt;0.0001</b> |
| IL17A :GF vs. IL17A :SFB                                    | -17.77                 | -98.18 to 62.64                | 0.9842            |
| IL17A :GF vs. TNF :GF                                       | -699.1                 | -776.3 to -621.8               | <b>&lt;0.0001</b> |
| IL17A :GF vs. TNF :SFB                                      | -807.1                 | -887.5 to -726.7               | <b>&lt;0.0001</b> |
| IL17A :SFB vs. TNF :GF                                      | -681.3                 | -761.7 to -600.9               | <b>&lt;0.0001</b> |
| IL17A :SFB vs. TNF :SFB                                     | -789.3                 | -872.8 to -705.9               | <b>&lt;0.0001</b> |
| TNF :GF vs. TNF :SFB                                        | -108                   | -188.4 to -27.62               | <b>0.0035</b>     |

**Supplemental Table 2.** 2-Way ANOVA results for CCL2 protein in supernatants derived from vehicle-control, IL17A, or TNF treated GF vs. SFB osteoblast cultures.

| <b>Supplemental Table 3. Number of osteoclasts per well (N.Oc/well) in RAW264.7 cells</b> |                        |                                |                   |
|-------------------------------------------------------------------------------------------|------------------------|--------------------------------|-------------------|
| <b>Tukey's multiple comparisons test</b>                                                  | <b>Mean Difference</b> | <b>95% Confidence Interval</b> | <b>P Value</b>    |
| VEH-Ctrl:GF vs. VEH-Ctrl:SFB                                                              | -10.97                 | -19.28 to -2.659               | <b>0.0017</b>     |
| VEH-Ctrl:GF vs. IL17A :GF                                                                 | -20.57                 | -28.55 to -12.59               | <b>&lt;0.0001</b> |
| VEH-Ctrl:GF vs. IL17A :SFB                                                                | -35.47                 | -43.78 to -27.16               | <b>&lt;0.0001</b> |
| VEH-Ctrl:GF vs. TNF :GF                                                                   | -51.67                 | -59.65 to -43.68               | <b>&lt;0.0001</b> |
| VEH-Ctrl:GF vs. TNF :SFB                                                                  | -54.13                 | -62.44 to -45.83               | <b>&lt;0.0001</b> |
| VEH-Ctrl:GF vs. VEH- $\alpha$ CXCL1 $\alpha$ CCL2:GF                                      | 5.857                  | -2.126 to 13.84                | 0.3669            |
| VEH-Ctrl:GF vs. VEH- $\alpha$ CXCL1 $\alpha$ CCL2:SFB                                     | 5.31                   | -3.000 to 13.62                | 0.5798            |
| VEH-Ctrl:GF vs. IL17A- $\alpha$ CXCL1 $\alpha$ CCL2:GF                                    | 2.143                  | -5.840 to 10.13                | 0.9988            |
| VEH-Ctrl:GF vs. IL17A- $\alpha$ CXCL1 $\alpha$ CCL2:SFB                                   | 0.3651                 | -7.944 to 8.674                | >0.9999           |
| VEH-Ctrl:GF vs. TNF- $\alpha$ CXCL1 $\alpha$ CCL2:GF                                      | 0.4286                 | -7.555 to 8.412                | >0.9999           |
| VEH-Ctrl:GF vs. TNF- $\alpha$ CXCL1 $\alpha$ CCL2:SFB                                     | -0.6905                | -9.000 to 7.619                | >0.9999           |
| VEH-Ctrl:SFB vs. IL17A :GF                                                                | -9.603                 | -17.91 to -1.294               | <b>0.0108</b>     |
| VEH-Ctrl:SFB vs. IL17A :SFB                                                               | -24.5                  | -33.12 to -15.88               | <b>&lt;0.0001</b> |
| VEH-Ctrl:SFB vs. TNF :GF                                                                  | -40.7                  | -49.01 to -32.39               | <b>&lt;0.0001</b> |
| VEH-Ctrl:SFB vs. TNF :SFB                                                                 | -43.17                 | -51.79 to -34.54               | <b>&lt;0.0001</b> |
| VEH-Ctrl:SFB vs. VEH- $\alpha$ CXCL1 $\alpha$ CCL2:GF                                     | 16.83                  | 8.516 to 25.13                 | <b>&lt;0.0001</b> |
| VEH-Ctrl:SFB vs. VEH- $\alpha$ CXCL1 $\alpha$ CCL2:SFB                                    | 16.28                  | 7.655 to 24.90                 | <b>&lt;0.0001</b> |
| VEH-Ctrl:SFB vs. IL17A- $\alpha$ CXCL1 $\alpha$ CCL2:GF                                   | 13.11                  | 4.802 to 21.42                 | <b>&lt;0.0001</b> |
| VEH-Ctrl:SFB vs. IL17A- $\alpha$ CXCL1 $\alpha$ CCL2:SFB                                  | 11.33                  | 2.711 to 19.96                 | <b>0.0019</b>     |
| VEH-Ctrl:SFB vs. TNF- $\alpha$ CXCL1 $\alpha$ CCL2:GF                                     | 11.4                   | 3.088 to 19.71                 | <b>0.0009</b>     |
| VEH-Ctrl:SFB vs. TNF- $\alpha$ CXCL1 $\alpha$ CCL2:SFB                                    | 10.28                  | 1.655 to 18.90                 | <b>0.0073</b>     |
| IL17A :GF vs. IL17A :SFB                                                                  | -14.9                  | -23.21 to -6.588               | <b>&lt;0.0001</b> |
| IL17A :GF vs. TNF :GF                                                                     | -31.1                  | -39.08 to -23.11               | <b>&lt;0.0001</b> |
| IL17A :GF vs. TNF :SFB                                                                    | -33.56                 | -41.87 to -25.25               | <b>&lt;0.0001</b> |
| IL17A :GF vs. VEH- $\alpha$ CXCL1 $\alpha$ CCL2:GF                                        | 26.43                  | 18.45 to 34.41                 | <b>&lt;0.0001</b> |
| IL17A :GF vs. VEH- $\alpha$ CXCL1 $\alpha$ CCL2:SFB                                       | 25.88                  | 17.57 to 34.19                 | <b>&lt;0.0001</b> |
| IL17A :GF vs. IL17A- $\alpha$ CXCL1 $\alpha$ CCL2:GF                                      | 22.71                  | 14.73 to 30.70                 | <b>&lt;0.0001</b> |
| IL17A :GF vs. IL17A- $\alpha$ CXCL1 $\alpha$ CCL2:SFB                                     | 20.94                  | 12.63 to 29.25                 | <b>&lt;0.0001</b> |
| IL17A :GF vs. TNF- $\alpha$ CXCL1 $\alpha$ CCL2:GF                                        | 21                     | 13.02 to 28.98                 | <b>&lt;0.0001</b> |
| IL17A :GF vs. TNF- $\alpha$ CXCL1 $\alpha$ CCL2:SFB                                       | 19.88                  | 11.57 to 28.19                 | <b>&lt;0.0001</b> |
| IL17A :SFB vs. TNF :GF                                                                    | -16.2                  | -24.51 to -7.889               | <b>&lt;0.0001</b> |
| IL17A :SFB vs. TNF :SFB                                                                   | -18.67                 | -27.29 to -10.04               | <b>&lt;0.0001</b> |
| IL17A :SFB vs. VEH- $\alpha$ CXCL1 $\alpha$ CCL2:GF                                       | 41.33                  | 33.02 to 49.63                 | <b>&lt;0.0001</b> |
| IL17A :SFB vs. VEH- $\alpha$ CXCL1 $\alpha$ CCL2:SFB                                      | 40.78                  | 32.16 to 49.40                 | <b>&lt;0.0001</b> |
| IL17A :SFB vs. IL17A- $\alpha$ CXCL1 $\alpha$ CCL2:GF                                     | 37.61                  | 29.30 to 45.92                 | <b>&lt;0.0001</b> |
| IL17A :SFB vs. IL17A- $\alpha$ CXCL1 $\alpha$ CCL2:SFB                                    | 35.83                  | 27.21 to 44.46                 | <b>&lt;0.0001</b> |
| IL17A :SFB vs. TNF- $\alpha$ CXCL1 $\alpha$ CCL2:GF                                       | 35.9                   | 27.59 to 44.21                 | <b>&lt;0.0001</b> |
| IL17A :SFB vs. TNF- $\alpha$ CXCL1 $\alpha$ CCL2:SFB                                      | 34.78                  | 26.15 to 43.40                 | <b>&lt;0.0001</b> |
| TNF :GF vs. TNF :SFB                                                                      | -2.468                 | -10.78 to 5.841                | 0.997             |
| TNF :GF vs. VEH- $\alpha$ CXCL1 $\alpha$ CCL2:GF                                          | 57.52                  | 49.54 to 65.51                 | <b>&lt;0.0001</b> |
| TNF :GF vs. VEH- $\alpha$ CXCL1 $\alpha$ CCL2:SFB                                         | 56.98                  | 48.67 to 65.29                 | <b>&lt;0.0001</b> |
| TNF :GF vs. IL17A- $\alpha$ CXCL1 $\alpha$ CCL2:GF                                        | 53.81                  | 45.83 to 61.79                 | <b>&lt;0.0001</b> |
| TNF :GF vs. IL17A- $\alpha$ CXCL1 $\alpha$ CCL2:SFB                                       | 52.03                  | 43.72 to 60.34                 | <b>&lt;0.0001</b> |
| TNF :GF vs. TNF- $\alpha$ CXCL1 $\alpha$ CCL2:GF                                          | 52.1                   | 44.11 to 60.08                 | <b>&lt;0.0001</b> |
| TNF :GF vs. TNF- $\alpha$ CXCL1 $\alpha$ CCL2:SFB                                         | 50.98                  | 42.67 to 59.29                 | <b>&lt;0.0001</b> |
| TNF :SFB vs. VEH- $\alpha$ CXCL1 $\alpha$ CCL2:GF                                         | 59.99                  | 51.68 to 68.30                 | <b>&lt;0.0001</b> |
| TNF :SFB vs. VEH- $\alpha$ CXCL1 $\alpha$ CCL2:SFB                                        | 59.44                  | 50.82 to 68.07                 | <b>&lt;0.0001</b> |
| TNF :SFB vs. IL17A- $\alpha$ CXCL1 $\alpha$ CCL2:GF                                       | 56.28                  | 47.97 to 64.59                 | <b>&lt;0.0001</b> |
| TNF :SFB vs. IL17A- $\alpha$ CXCL1 $\alpha$ CCL2:SFB                                      | 54.5                   | 45.88 to 63.12                 | <b>&lt;0.0001</b> |
| TNF :SFB vs. TNF- $\alpha$ CXCL1 $\alpha$ CCL2:GF                                         | 54.56                  | 46.25 to 62.87                 | <b>&lt;0.0001</b> |
| TNF :SFB vs. TNF- $\alpha$ CXCL1 $\alpha$ CCL2:SFB                                        | 53.44                  | 44.82 to 62.07                 | <b>&lt;0.0001</b> |
| VEH- $\alpha$ CXCL1 $\alpha$ CCL2:GF vs. VEH- $\alpha$ CXCL1 $\alpha$ CCL2:SFB            | -0.5476                | -8.857 to 7.762                | >0.9999           |
| VEH- $\alpha$ CXCL1 $\alpha$ CCL2:GF vs. IL17A- $\alpha$ CXCL1 $\alpha$ CCL2:GF           | -3.714                 | -11.70 to 4.269                | 0.9114            |
| VEH- $\alpha$ CXCL1 $\alpha$ CCL2:GF vs. IL17A- $\alpha$ CXCL1 $\alpha$ CCL2:SFB          | -5.492                 | -13.80 to 2.817                | 0.5284            |
| VEH- $\alpha$ CXCL1 $\alpha$ CCL2:GF vs. TNF- $\alpha$ CXCL1 $\alpha$ CCL2:GF             | -5.429                 | -13.41 to 2.555                | 0.4844            |
| VEH- $\alpha$ CXCL1 $\alpha$ CCL2:GF vs. TNF- $\alpha$ CXCL1 $\alpha$ CCL2:SFB            | -6.548                 | -14.86 to 1.761                | 0.2644            |
| VEH- $\alpha$ CXCL1 $\alpha$ CCL2:SFB vs. IL17A- $\alpha$ CXCL1 $\alpha$ CCL2:GF          | -3.167                 | -11.48 to 5.142                | 0.9775            |
| VEH- $\alpha$ CXCL1 $\alpha$ CCL2:SFB vs. IL17A- $\alpha$ CXCL1 $\alpha$ CCL2:SFB         | -4.944                 | -13.57 to 3.678                | 0.7285            |
| VEH- $\alpha$ CXCL1 $\alpha$ CCL2:SFB vs. TNF- $\alpha$ CXCL1 $\alpha$ CCL2:GF            | -4.881                 | -13.19 to 3.428                | 0.6981            |
| VEH- $\alpha$ CXCL1 $\alpha$ CCL2:SFB vs. TNF- $\alpha$ CXCL1 $\alpha$ CCL2:SFB           | -6                     | -14.62 to 2.623                | 0.4485            |
| IL17A- $\alpha$ CXCL1 $\alpha$ CCL2:GF vs. IL17A- $\alpha$ CXCL1 $\alpha$ CCL2:SFB        | -1.778                 | -10.09 to 6.531                | 0.9999            |
| IL17A- $\alpha$ CXCL1 $\alpha$ CCL2:GF vs. TNF- $\alpha$ CXCL1 $\alpha$ CCL2:GF           | -1.714                 | -9.697 to 6.269                | 0.9999            |
| IL17A- $\alpha$ CXCL1 $\alpha$ CCL2:GF vs. TNF- $\alpha$ CXCL1 $\alpha$ CCL2:SFB          | -2.833                 | -11.14 to 5.476                | 0.9905            |
| IL17A- $\alpha$ CXCL1 $\alpha$ CCL2:SFB vs. TNF- $\alpha$ CXCL1 $\alpha$ CCL2:GF          | 0.06349                | -8.246 to 8.373                | >0.9999           |
| IL17A- $\alpha$ CXCL1 $\alpha$ CCL2:SFB vs. TNF- $\alpha$ CXCL1 $\alpha$ CCL2:SFB         | -1.056                 | -9.678 to 7.567                | >0.9999           |
| TNF- $\alpha$ CXCL1 $\alpha$ CCL2:GF vs. TNF- $\alpha$ CXCL1 $\alpha$ CCL2:SFB            | -1.119                 | -9.428 to 7.190                | >0.9999           |

**Supplemental Table 3.** 2-Way ANOVA results for Number of Osteoclasts per well in RAW264.7 cells stimulated with supernatants derived from vehicle-control, IL17A, or TNF treated GF vs. SFB osteoblast cultures.

| Supplemental Table 4. Osteoclast size (Oc.Ar/Oc) in RAW264.7 cells                 |                 |                         |                   |
|------------------------------------------------------------------------------------|-----------------|-------------------------|-------------------|
| Tukey's multiple comparisons test                                                  | Mean Difference | 95% Confidence Interval | P Value           |
| VEH-Ctrl:GF vs. VEH-Ctrl:SFB                                                       | -248.1          | -454.9 to -41.26        | <b>0.0067</b>     |
| VEH-Ctrl:GF vs. IL17A:GF                                                           | -45.55          | -244.3 to 153.2         | 0.9997            |
| VEH-Ctrl:GF vs. IL17A:SFB                                                          | -150.6          | -349.3 to 48.13         | 0.32              |
| VEH-Ctrl:GF vs. TNF :GF                                                            | -282.9          | -481.6 to -84.15        | <b>0.0005</b>     |
| VEH-Ctrl:GF vs. TNF :SFB                                                           | -331.2          | -538.1 to -124.4        | <b>&lt;0.0001</b> |
| VEH-Ctrl:GF vs. VEH- $\alpha$ CXCL1 $\alpha$ CCL2:GF                               | 18.86           | -179.8 to 217.6         | >0.9999           |
| VEH-Ctrl:GF vs. VEH- $\alpha$ CXCL1 $\alpha$ CCL2:SFB                              | -23.43          | -222.1 to 175.3         | >0.9999           |
| VEH-Ctrl:GF vs. IL17A- $\alpha$ CXCL1 $\alpha$ CCL2:GF                             | 35.57           | -163.1 to 234.3         | >0.9999           |
| VEH-Ctrl:GF vs. IL17A- $\alpha$ CXCL1 $\alpha$ CCL2:SFB                            | 57.6            | -149.2 to 264.4         | 0.9984            |
| VEH-Ctrl:GF vs. TNF- $\alpha$ CXCL1 $\alpha$ CCL2:GF                               | 31.71           | -167.0 to 230.4         | >0.9999           |
| VEH-Ctrl:GF vs. TNF- $\alpha$ CXCL1 $\alpha$ CCL2:SFB                              | -97.24          | -304.1 to 109.6         | 0.9063            |
| VEH-Ctrl:SFB vs. IL17A:GF                                                          | 202.5           | -4.294 to 409.3         | 0.0603            |
| VEH-Ctrl:SFB vs. IL17A:SFB                                                         | 97.5            | -109.3 to 304.3         | 0.9048            |
| VEH-Ctrl:SFB vs. TNF :GF                                                           | -34.79          | -241.6 to 172.0         | >0.9999           |
| VEH-Ctrl:SFB vs. TNF :SFB                                                          | -83.17          | -297.8 to 131.5         | 0.9748            |
| VEH-Ctrl:SFB vs. VEH- $\alpha$ CXCL1 $\alpha$ CCL2:GF                              | 266.9           | 60.11 to 473.7          | <b>0.0024</b>     |
| VEH-Ctrl:SFB vs. VEH- $\alpha$ CXCL1 $\alpha$ CCL2:SFB                             | 224.6           | 17.83 to 431.5          | <b>0.0219</b>     |
| VEH-Ctrl:SFB vs. IL17A- $\alpha$ CXCL1 $\alpha$ CCL2:GF                            | 283.6           | 76.83 to 490.5          | <b>0.0009</b>     |
| VEH-Ctrl:SFB vs. IL17A- $\alpha$ CXCL1 $\alpha$ CCL2:SFB                           | 305.7           | 91.04 to 520.3          | <b>0.0005</b>     |
| VEH-Ctrl:SFB vs. TNF- $\alpha$ CXCL1 $\alpha$ CCL2:GF                              | 279.8           | 72.97 to 486.6          | <b>0.0012</b>     |
| VEH-Ctrl:SFB vs. TNF- $\alpha$ CXCL1 $\alpha$ CCL2:SFB                             | 150.8           | -63.79 to 365.5         | 0.4343            |
| IL17A:GF vs. IL17A:SFB                                                             | -105            | -303.7 to 93.68         | 0.8182            |
| IL17A:GF vs. TNF :GF                                                               | -237.3          | -436.0 to -38.60        | <b>0.0071</b>     |
| IL17A:GF vs. TNF :SFB                                                              | -285.7          | -492.5 to -78.87        | <b>0.0008</b>     |
| IL17A:GF vs. VEH- $\alpha$ CXCL1 $\alpha$ CCL2:GF                                  | 64.41           | -134.3 to 263.1         | 0.9939            |
| IL17A:GF vs. VEH- $\alpha$ CXCL1 $\alpha$ CCL2:SFB                                 | 22.12           | -176.6 to 220.8         | >0.9999           |
| IL17A:GF vs. IL17A- $\alpha$ CXCL1 $\alpha$ CCL2:GF                                | 81.12           | -117.6 to 279.8         | 0.9632            |
| IL17A:GF vs. IL17A- $\alpha$ CXCL1 $\alpha$ CCL2:SFB                               | 103.1           | -103.7 to 310.0         | 0.8674            |
| IL17A:GF vs. TNF- $\alpha$ CXCL1 $\alpha$ CCL2:GF                                  | 77.26           | -121.4 to 276.0         | 0.9741            |
| IL17A:GF vs. TNF- $\alpha$ CXCL1 $\alpha$ CCL2:SFB                                 | -51.69          | -258.5 to 155.1         | 0.9994            |
| IL17A:SFB vs. TNF :GF                                                              | -132.3          | -331.0 to 66.42         | 0.5187            |
| IL17A:SFB vs. TNF :SFB                                                             | -180.7          | -387.5 to 26.15         | 0.1449            |
| IL17A:SFB vs. VEH- $\alpha$ CXCL1 $\alpha$ CCL2:GF                                 | 169.4           | -29.27 to 368.1         | 0.1696            |
| IL17A:SFB vs. VEH- $\alpha$ CXCL1 $\alpha$ CCL2:SFB                                | 127.1           | -71.56 to 325.8         | 0.5793            |
| IL17A:SFB vs. IL17A- $\alpha$ CXCL1 $\alpha$ CCL2:GF                               | 186.1           | -12.56 to 384.8         | 0.0872            |
| IL17A:SFB vs. IL17A- $\alpha$ CXCL1 $\alpha$ CCL2:SFB                              | 208.2           | 1.351 to 415.0          | <b>0.0471</b>     |
| IL17A:SFB vs. TNF- $\alpha$ CXCL1 $\alpha$ CCL2:GF                                 | 182.3           | -16.42 to 381.0         | 0.1024            |
| IL17A:SFB vs. TNF- $\alpha$ CXCL1 $\alpha$ CCL2:SFB                                | 53.33           | -153.5 to 260.1         | 0.9992            |
| TNF :GF vs. TNF :SFB                                                               | -48.38          | -255.2 to 158.4         | 0.9997            |
| TNF :GF vs. VEH- $\alpha$ CXCL1 $\alpha$ CCL2:GF                                   | 301.7           | 103.0 to 500.4          | <b>0.0002</b>     |
| TNF :GF vs. VEH- $\alpha$ CXCL1 $\alpha$ CCL2:SFB                                  | 259.4           | 60.73 to 458.1          | <b>0.002</b>      |
| TNF :GF vs. IL17A- $\alpha$ CXCL1 $\alpha$ CCL2:GF                                 | 318.4           | 119.7 to 517.1          | <b>&lt;0.0001</b> |
| TNF :GF vs. IL17A- $\alpha$ CXCL1 $\alpha$ CCL2:SFB                                | 340.5           | 133.6 to 547.3          | <b>&lt;0.0001</b> |
| TNF :GF vs. TNF- $\alpha$ CXCL1 $\alpha$ CCL2:GF                                   | 314.6           | 115.9 to 513.3          | <b>&lt;0.0001</b> |
| TNF :GF vs. TNF- $\alpha$ CXCL1 $\alpha$ CCL2:SFB                                  | 185.6           | -21.20 to 392.4         | 0.1203            |
| TNF :SFB vs. VEH- $\alpha$ CXCL1 $\alpha$ CCL2:GF                                  | 350.1           | 143.3 to 556.9          | <b>&lt;0.0001</b> |
| TNF :SFB vs. VEH- $\alpha$ CXCL1 $\alpha$ CCL2:SFB                                 | 307.8           | 101.0 to 514.6          | <b>0.0002</b>     |
| TNF :SFB vs. IL17A- $\alpha$ CXCL1 $\alpha$ CCL2:GF                                | 366.8           | 160.0 to 573.6          | <b>&lt;0.0001</b> |
| TNF :SFB vs. IL17A- $\alpha$ CXCL1 $\alpha$ CCL2:SFB                               | 388.8           | 174.2 to 603.5          | <b>&lt;0.0001</b> |
| TNF :SFB vs. TNF- $\alpha$ CXCL1 $\alpha$ CCL2:GF                                  | 363             | 156.1 to 569.8          | <b>&lt;0.0001</b> |
| TNF :SFB vs. TNF- $\alpha$ CXCL1 $\alpha$ CCL2:SFB                                 | 234             | 19.38 to 448.6          | <b>0.021</b>      |
| VEH- $\alpha$ CXCL1 $\alpha$ CCL2:GF vs. VEH- $\alpha$ CXCL1 $\alpha$ CCL2:SFB     | -42.29          | -241.0 to 156.4         | 0.9999            |
| VEH- $\alpha$ CXCL1 $\alpha$ CCL2:GF vs. IL17A- $\alpha$ CXCL1 $\alpha$ CCL2:GF    | 16.71           | -182.0 to 215.4         | >0.9999           |
| VEH- $\alpha$ CXCL1 $\alpha$ CCL2:GF vs. IL17A- $\alpha$ CXCL1 $\alpha$ CCL2:SFB   | 38.74           | -168.1 to 245.6         | >0.9999           |
| VEH- $\alpha$ CXCL1 $\alpha$ CCL2:GF vs. TNF- $\alpha$ CXCL1 $\alpha$ CCL2:GF      | 12.86           | -185.8 to 211.6         | >0.9999           |
| VEH- $\alpha$ CXCL1 $\alpha$ CCL2:GF vs. TNF- $\alpha$ CXCL1 $\alpha$ CCL2:SFB     | -116.1          | -322.9 to 90.72         | 0.7551            |
| VEH- $\alpha$ CXCL1 $\alpha$ CCL2:SFB vs. IL17A- $\alpha$ CXCL1 $\alpha$ CCL2:GF   | 59              | -139.7 to 257.7         | 0.9971            |
| VEH- $\alpha$ CXCL1 $\alpha$ CCL2:SFB vs. IL17A- $\alpha$ CXCL1 $\alpha$ CCL2:SFB  | 81.02           | -125.8 to 287.8         | 0.9727            |
| VEH- $\alpha$ CXCL1 $\alpha$ CCL2:SFB vs. TNF- $\alpha$ CXCL1 $\alpha$ CCL2:GF     | 55.14           | -143.6 to 253.8         | 0.9984            |
| VEH- $\alpha$ CXCL1 $\alpha$ CCL2:SFB vs. TNF- $\alpha$ CXCL1 $\alpha$ CCL2:SFB    | -73.81          | -280.6 to 133.0         | 0.9866            |
| IL17A- $\alpha$ CXCL1 $\alpha$ CCL2:GF vs. IL17A- $\alpha$ CXCL1 $\alpha$ CCL2:SFB | 22.02           | -184.8 to 228.8         | >0.9999           |
| IL17A- $\alpha$ CXCL1 $\alpha$ CCL2:GF vs. TNF- $\alpha$ CXCL1 $\alpha$ CCL2:GF    | -3.857          | -202.6 to 194.8         | >0.9999           |
| IL17A- $\alpha$ CXCL1 $\alpha$ CCL2:GF vs. TNF- $\alpha$ CXCL1 $\alpha$ CCL2:SFB   | -132.8          | -339.6 to 74.01         | 0.5739            |
| IL17A- $\alpha$ CXCL1 $\alpha$ CCL2:SFB vs. TNF- $\alpha$ CXCL1 $\alpha$ CCL2:GF   | -25.88          | -232.7 to 180.9         | >0.9999           |
| IL17A- $\alpha$ CXCL1 $\alpha$ CCL2:SFB vs. TNF- $\alpha$ CXCL1 $\alpha$ CCL2:SFB  | -154.8          | -369.5 to 59.79         | 0.3937            |
| TNF- $\alpha$ CXCL1 $\alpha$ CCL2:GF vs. TNF- $\alpha$ CXCL1 $\alpha$ CCL2:SFB     | -129            | -335.8 to 77.86         | 0.6175            |

**Supplemental Table 4.** 2-Way ANOVA results for Osteoclast Size in RAW264.7 cells stimulated with supernatants derived from vehicle-control, IL17A, or TNF treated GF vs. SFB osteoblast cultures.
